# Supplementary material for: A rare case of ciliated muconodular papillary tumor accompanied with adenocarcinoma in situ
Source: Springer Nature journal article supplement (doi:10.1186/s12890-021-01581-9), 2021-07-12
Supplement: MOESM1 [file 19353986]

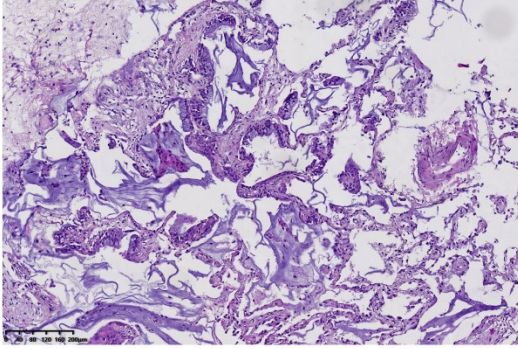

**Supplemental Figure:** Representative H&E staining for Fig 2.
